# Supplementary material for: Developing a patient and family-centred approach for measuring the quality of injury care: a study protocol
Source: PubMed Central journal article supplement (PMC3570378; doi:10.1186/1472-6963-13-31), 2013-01-27
Supplement: 1472-6963-13-31-S2.pdf [file 1472-6963-13-31-S2.pdf]

**Additional file 2. Draft Clinical Sensibility Instrument**

**How are we doing?**

**Your Opinions about Our Patient and Family-Centred Quality Indicator Survey**

**1. Please rate the patient and family-centred quality indicators using the following criteria:**

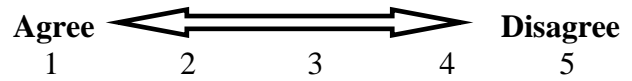

|                                                                                       |   |   |   |   |   |
|---------------------------------------------------------------------------------------|---|---|---|---|---|
| Simple and easy to understand                                                         | 1 | 2 | 3 | 4 | 5 |
| Likely to elicit honest information about quality of injury care                      | 1 | 2 | 3 | 4 | 5 |
| Directed at important elements of quality of injury care                              | 1 | 2 | 3 | 4 | 5 |
| Missing important patient and/or family perspectives on quality of injury care        | 1 | 2 | 3 | 4 | 5 |
| Includes duplicate items                                                              | 1 | 2 | 3 | 4 | 5 |
| Likely to distinguish between patients and families receiving good care and poor care | 1 | 2 | 3 | 4 | 5 |
| An important tool for measuring, reporting and improving the quality of injury care   | 1 | 2 | 3 | 4 | 5 |

**2. What suggestions do you have to improve the patient and family-centred injury quality indicators?**

---

---

---

---

**3. What suggestions do you have to improve the quality of injury care?**

---

---

---

---
